# Supplementary material for: Feasibility of a Voice-Enabled Medical Diary App (SpeakHealth) for Caregivers of Children With Special Health Care Needs and Health Care Providers: Mixed Methods Study
Source: PubMed Central journal article supplement (PMC8150418; doi:10.2196/25503), 2021-05-11
Supplement: formative_v5i5e25503_app1.pdf [file formative_v5i5e25503_app1.pdf]

**Guiding questions for the interviews (sample set)**

|                                                           |                                                                                                                                                                                                                                                                                                                                                                                                                                                                                                                                                                                                                                                                                                                                                                                                                                                                                                                                                                                                                                                           |
|-----------------------------------------------------------|-----------------------------------------------------------------------------------------------------------------------------------------------------------------------------------------------------------------------------------------------------------------------------------------------------------------------------------------------------------------------------------------------------------------------------------------------------------------------------------------------------------------------------------------------------------------------------------------------------------------------------------------------------------------------------------------------------------------------------------------------------------------------------------------------------------------------------------------------------------------------------------------------------------------------------------------------------------------------------------------------------------------------------------------------------------|
| <p><b>Day in life</b></p>                                 | <ul style="list-style-type: none"> <li>• Can you summarize a regular day in your life - morning, work and school time and evening activities for you and your child?</li> <li>• Routines for weekdays and weekends?</li> </ul>                                                                                                                                                                                                                                                                                                                                                                                                                                                                                                                                                                                                                                                                                                                                                                                                                            |
| <p><b>Technology at home</b></p>                          | <ul style="list-style-type: none"> <li>• What technologies do you use at home (TV, computer, smartphone)?</li> <li>• Which apps do you use mostly at your phone?</li> <li>• Which apps are your favorite ones?</li> <li>• Have you used any apps related to care coordination or care management for your kid?</li> <li>• If you could imagine a technology that would help better, what would you like to have?</li> </ul>                                                                                                                                                                                                                                                                                                                                                                                                                                                                                                                                                                                                                               |
| <p><b>Voice technology</b></p>                            | <ul style="list-style-type: none"> <li>• What do you think about using voice interaction with your Smartphone? Smart speaker?</li> <li>• In what conditions do you use voice to interact with devices?</li> </ul>                                                                                                                                                                                                                                                                                                                                                                                                                                                                                                                                                                                                                                                                                                                                                                                                                                         |
| <p><b>Speakhealth app - utility focused questions</b></p> | <ul style="list-style-type: none"> <li>• Do you think voice-interaction is an easy to use method compared the other apps you use? Why?</li> <li>• Based on our previous scenarios, would you find it hard to enter your notes with voice in comparison to entering text?</li> <li>• Do you think voice interaction could be useful to keep track of symptoms and medicine?</li> <li>• Do you think voice-interaction is useful way to communicate health care with others?</li> <li>• Would you use SpeakHealth or similar voice-interactive apps in the future to help you take care of your child? Why or why not?</li> <li>• Do you have any recommendations for content or features that should be in the app for better care management and encouraging for you to use?</li> <li>• Would you like the app/skill more if it was personalized or tailored more than its current state? If so, any suggestions?</li> <li>• How would you envision the future use of voice interactive technologies for symptom tracking and care management?</li> </ul> |
