# Supplementary material for: Feasibility of a Voice-Enabled Medical Diary App (SpeakHealth) for Caregivers of Children With Special Health Care Needs and Health Care Providers: Mixed Methods Study
Source: PubMed Central journal article supplement (PMC8150418; doi:10.2196/25503), 2021-05-11

## Sign Up/Authentication

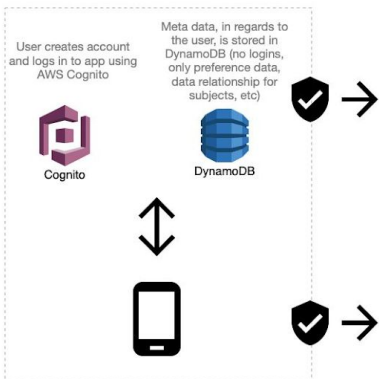

## Other AWS Services in Use

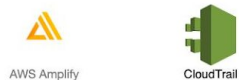

## Health Note Data Journey

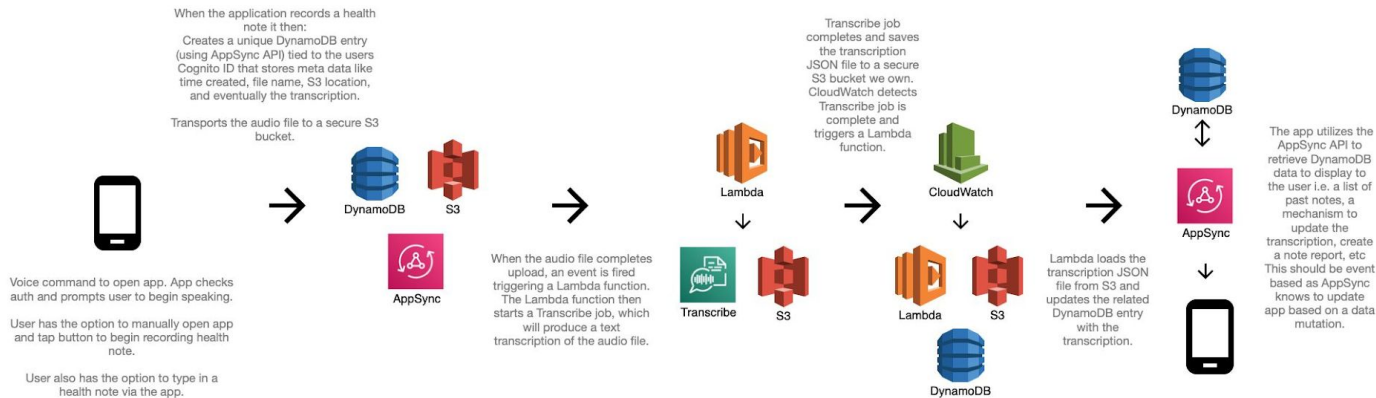

## Epic Integration - Data Retrieval (not implemented)

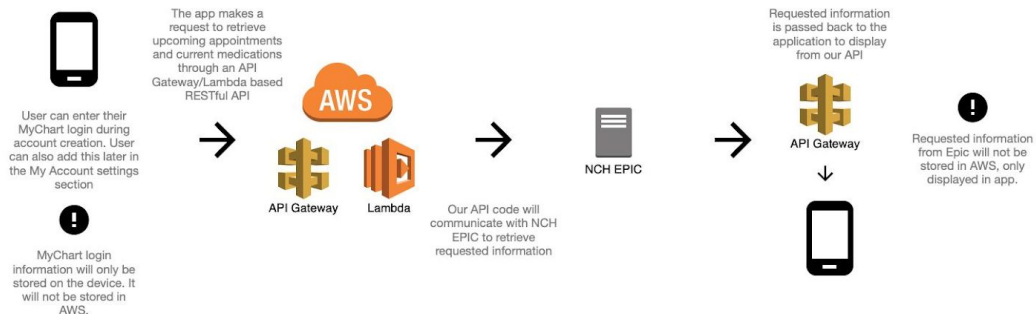

Supplement: formative_v5i5e25503_app2.pdf [file formative_v5i5e25503_app2.pdf]
